# Supplementary material
Source: PubMed Central journal article supplement (PMC4014846)
Supplement: supp_blood-2013-08-520775_Document1.pdf [file supp_blood-2013-08-520775_Document1.pdf]

### Supplemental Table, Figures, and Figure Legends

**Table S1. Anti-tumor memory response in previously vaccinated HSCT recipients.**

| <u>Treatment</u>                                 | <u>No. with tumor</u> <sup>*</sup> /<br><u>No. injected</u> <sup>†</sup> | <u>% with tumor</u> <sup>‡</sup> |
|--------------------------------------------------|--------------------------------------------------------------------------|----------------------------------|
| Untreated                                        |                                                                          |                                  |
| Non-transplanted                                 | 9 / 9                                                                    | 100                              |
| E.G7-gp96-Ig <sup>§</sup>                        |                                                                          |                                  |
| BM + T cells <sup>  </sup>                       | 0 / 6                                                                    | 0                                |
| E.G7-gp96-Ig + IL-2 <sub>S4B6</sub> <sup>§</sup> |                                                                          |                                  |
| BM + T cells <sup>  </sup>                       | 2 / 14                                                                   | 14.3                             |

\*Mice with progressively growing tumors (sacrificed  $\geq 225$  mm<sup>2</sup>).

†Mice were challenged with E.G7 lymphoma cells subcutaneously ( $1.0 \times 10^6$ ).

‡Total rejection rate of HSCT recipients was 90% (18/20).

§Transplant recipients were  $\geq 100$  d post-HSCT (Figure 4-6).

|| $\geq 75\%$  CD4<sup>+</sup> and CD8<sup>+</sup>;  $\leq 3\%$  CD19<sup>+</sup> (Materials and methods).

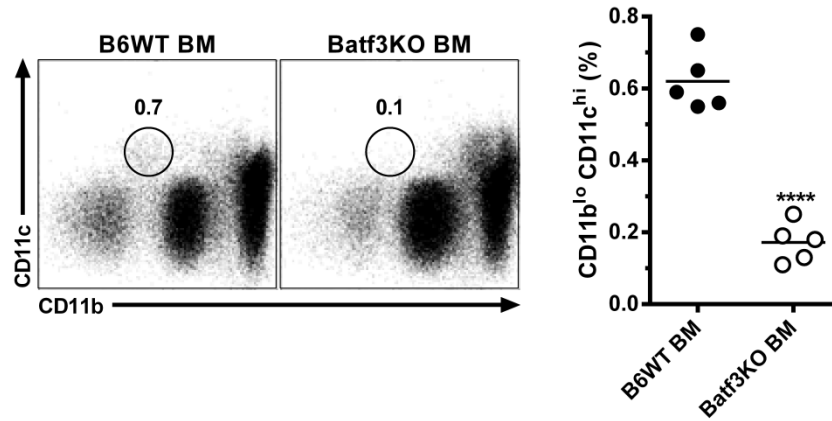

**Figure S1. Loss of CD11b<sup>lo</sup> CD11c<sup>hi</sup> DC at the site of vaccination in recipients of Batf3 deficient TCD-BM receiving gp96-Ig secreting tumor cells.** Conditioned (9.5 Gy) B6 mice were transplanted with  $5.0 \times 10^6$  B6 wild-type (B6WT) or Batf3 deficient (Batf3KO) TCD-BM cells and adoptively transferred with  $0.5 \times 10^6$  CD8<sup>+</sup> T cells specific for OVA<sub>257-264</sub> (OT-I) 5 d later. After a 2 d resting period, recipients were vaccinated intraperitoneally with irradiated (40 Gy) EL-4 lymphoma cells expressing OVA (E.G7) engineered to secrete gp96-Ig (E.G7-gp96-Ig). The peritoneal cavity was analyzed 5 d following vaccination and DC populations were assessed. CD11c<sup>hi</sup> CD11b<sup>lo</sup> F4/80<sup>lo</sup> Gr-1<sup>lo</sup> frequency in the peritoneal cavity; representative dot plots (left), n = 5 (right).

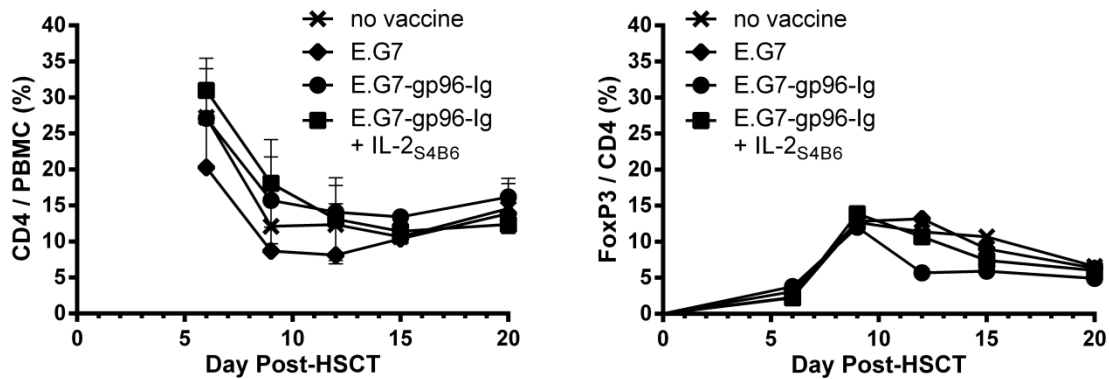

**Figure S2. Systemic CD4<sup>+</sup> T cell and Treg levels were marginally changed following IL-2<sub>S4B6</sub> treatment in syngeneic HSCT recipients.** Conditioned (9.5 Gy) B6 recipients received B6-CD45.1<sup>+</sup> TCD-BM cells supplemented with  $2.0 \times 10^6$  B6-CD90.1<sup>+</sup> CD4<sup>+</sup> and CD8<sup>+</sup> T lymphocytes obtained from E.G7 lymphoma bearing donors, containing ~1000 tumor-reactive CD8<sup>+</sup> T cells (OT-I). Recipients were inoculated intraperitoneally with  $1.0 \times 10^5$  E.G7 lymphoma cells 1 d post-HSCT to simulate relapse post-transplant. Mice were vaccinated intraperitoneally with irradiated (40 Gy) E.G7 cells secreting gp96-Ig 2 d post-HSCT (repeated every 3 d for a total of 5 vaccinations) and received IL-2 pre-bound to anti-IL-2 mAb clone S4B6 (IL-2<sub>S4B6</sub>) 1 d following each vaccination as indicated. **(Left)** Systemic CD4<sup>+</sup> T cell levels were unchanged following IL-2<sub>S4B6</sub> treatment in syngeneic HSCT recipients. CD4<sup>+</sup> T cell frequency in the peripheral blood; n = 10 from pool of 2 experiments; x: no vaccine, ◆: E.G7, ●: E.G7-gp96-Ig, ■: E.G7-gp96-Ig + IL-2<sub>S4B6</sub>. **(Right)** Systemic CD4<sup>+</sup> FoxP3<sup>+</sup> Treg levels were marginally changed following IL-2<sub>S4B6</sub> treatment in syngeneic HSCT recipients. FoxP3<sup>+</sup> frequency within CD4<sup>+</sup> T cells in the peripheral blood utilizing mice expressing red fluorescent protein under control of the FoxP3 promoter as T cell donors; n = pool of 5; x: no vaccine, ◆: E.G7, ●: E.G7-gp96-Ig, ■: E.G7-gp96-Ig + IL-2<sub>S4B6</sub>.

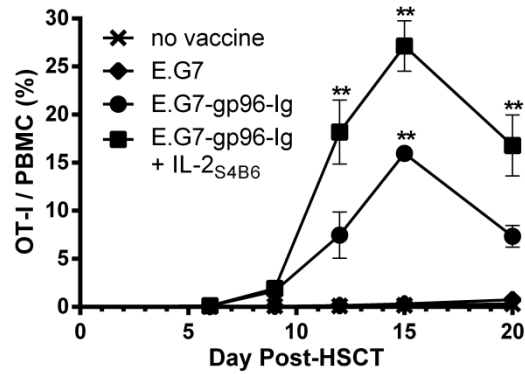

**Figure S3. Tumor-reactive CD8<sup>+</sup> T cells reached maximal levels in the peripheral blood 2 wk post-HSCT following vaccination and IL-2 therapy.** Transplants and tumor inoculation were performed as in Figure S2 and mice were treated as indicated; n = 20 from pool of 4 experiments; x: no vaccine, ♦: E.G7, ●: E.G7-gp96-Ig, ■: E.G7-gp96-Ig + IL-2<sub>S4B6</sub>. The 'no vaccine,' 'E.G7,' and 'E.G7-gp9-Ig' groups from Figure 4B were included as a reference to illustrate the kinetics of expansion with vaccination and IL-2<sub>S4B6</sub>.

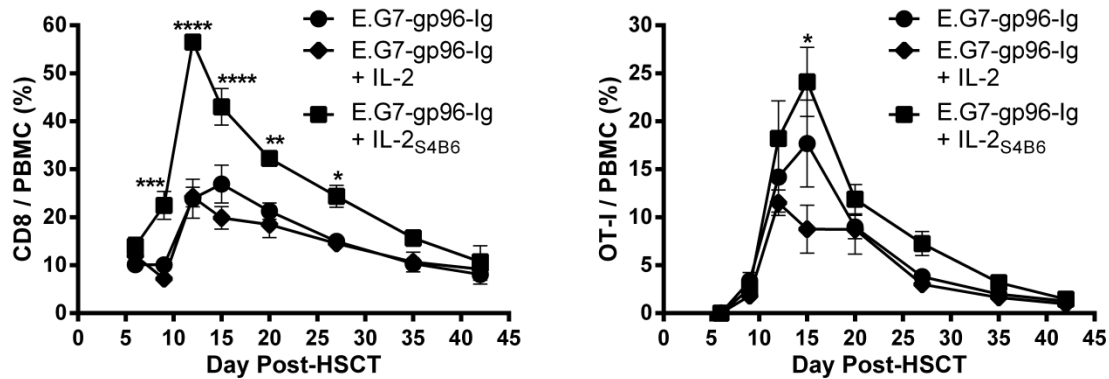

**Figure S4. Non-complexed, unbound IL-2 in combination with vaccination failed to expand CD8<sup>+</sup> T cells or enhance tumor-reactive CD8<sup>+</sup> T lymphocyte levels.** Transplants and tumor inoculation were performed as in Figure S2 and mice were treated as indicated, including IL-2 not pre-bound to anti-IL-2. **(Left)** Non-complexed, unbound IL-2 in combination with vaccination failed to expand CD8<sup>+</sup> T lymphocytes. CD8<sup>+</sup> T cell frequency in the peripheral blood; n = 5; ●: E.G7-gp96-Ig, ◆: E.G7-gp96-Ig + IL-2, ■: E.G7-gp96-Ig + IL-2<sub>S4B6</sub>. **(Right)** Non-complexed, unbound IL-2 in combination with vaccination failed to expand tumor-reactive CD8<sup>+</sup> T lymphocytes. Tumor-reactive CD8<sup>+</sup> T cell frequency in the peripheral blood; n = 5. ●: E.G7-gp96-Ig, ◆: E.G7-gp96-Ig + IL-2, ■: E.G7-gp96-Ig + IL-2<sub>S4B6</sub>. Extended analyses of these CD8<sup>+</sup> T lymphocyte frequencies in mice treated with vaccination and IL-2<sub>S4B6</sub> suggested that slightly increased levels were maintained for at least 6 wk post-HSCT, or 1 mo following cessation of treatment.

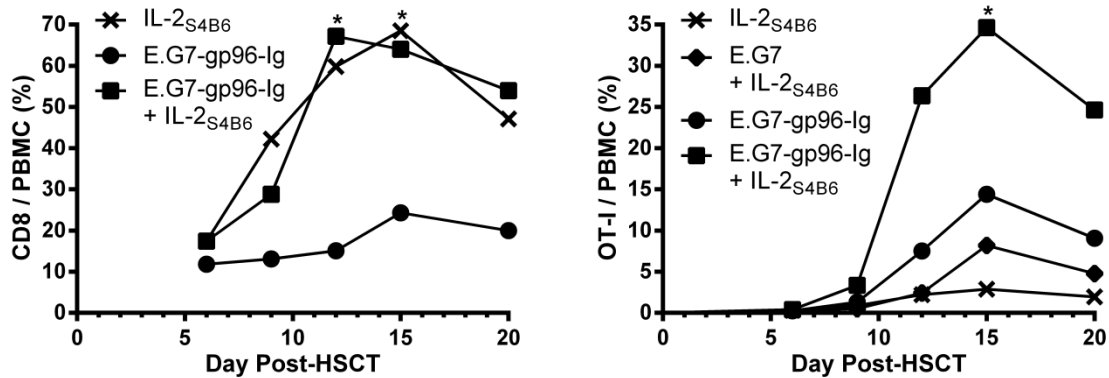

**Figure S5. IL-2<sub>S4B6</sub> in the absence of vaccination markedly expanded CD8<sup>+</sup> T cells, but only elicited a small response by tumor-reactive CD8<sup>+</sup> T lymphocytes.** Transplants and tumor inoculation were performed as in Figure S2 and recipients were treated as indicated, including IL-2<sub>S4B6</sub> in the absence of vaccination. **(Left)** IL-2<sub>S4B6</sub> in the absence of vaccination markedly expanded CD8<sup>+</sup> T cells. CD8<sup>+</sup> T cell frequency in the peripheral blood; n = pool of 5; x: IL-2<sub>S4B6</sub>, ●: E.G7-gp96-Ig, ■: E.G7-gp96-Ig + IL-2<sub>S4B6</sub>. **(Right)** IL-2<sub>S4B6</sub> in the absence of vaccination only elicited a small response by tumor-reactive CD8<sup>+</sup> T lymphocytes. Tumor-reactive CD8<sup>+</sup> T cell frequency in the peripheral blood; n = pool of 5; x: IL-2<sub>S4B6</sub>, ◆: E.G7 + IL-2<sub>S4B6</sub>, ●: E.G7-gp96-Ig, ■: E.G7-gp96-Ig + IL-2<sub>S4B6</sub>.

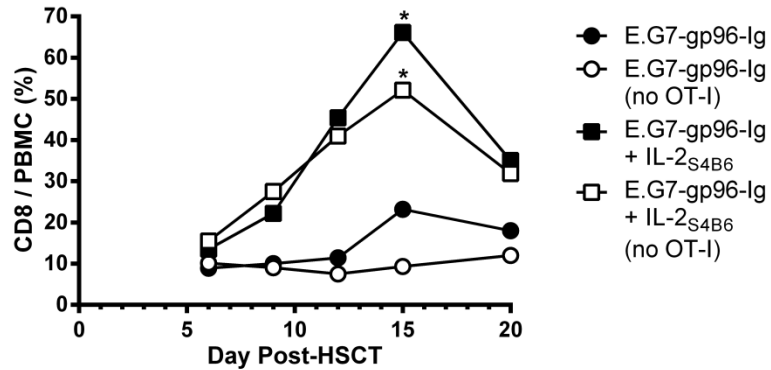

**Figure S6. CD8<sup>+</sup> T cells markedly expanded following vaccination and IL-2<sub>S4B6</sub> in the absence of transgenic CD8<sup>+</sup> OT-I T lymphocytes.** Transplants and tumor inoculation were performed as in Figure S2 utilizing T cell donors with or without transgenic CD8<sup>+</sup> OT-I T cells and recipients were treated as indicated. CD8<sup>+</sup> T cell frequency in the peripheral blood; n = pool of 5; ●: E.G7-gp96-Ig, ○: E.G7-gp96-Ig (no OT-I), ■: E.G7-gp96-Ig + IL-2<sub>S4B6</sub>, □: E.G7-gp96-Ig + IL-2<sub>S4B6</sub> (no OT-I). The small increase observed in CD8<sup>+</sup> T lymphocyte frequency in both groups containing CD8<sup>+</sup> OT-I T cells likely represents the presence of the transgenic CD8<sup>+</sup> T cell population.

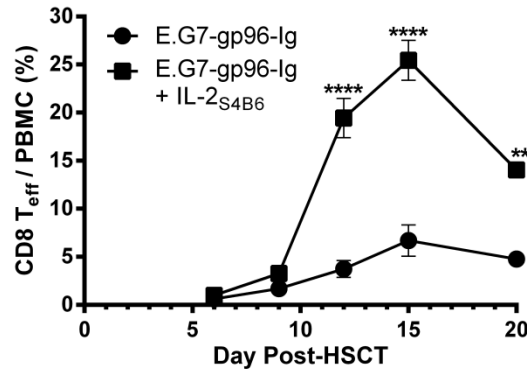

**Figure S7. IL-2<sub>S4B6</sub> in combination with vaccination elicits potent effector CD8<sup>+</sup> T cell response.**

Transplants and tumor inoculation were performed as in Figure S2, but without the addition of CD8<sup>+</sup> OT-I T cells, and recipients were treated as indicated. CD8<sup>+</sup> T<sub>eff</sub> (CD62L<sup>-</sup> CD44<sup>+</sup>) cell frequency in the peripheral blood; n = 21 from pool of 4 experiments; ●: E.G7-gp96-Ig, ■: E.G7-gp96-Ig + IL-2<sub>S4B6</sub>.



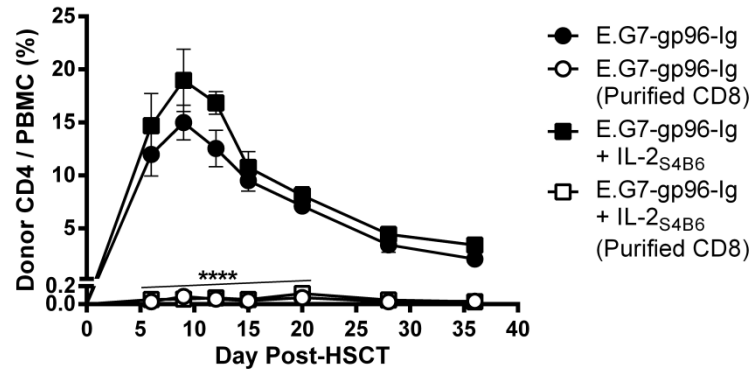

**Figure S8. Donor CD4<sup>+</sup> T cells were minimally detectable in recipients of purified CD8<sup>+</sup> T cells.**

Transplants and tumor inoculation were performed as in Figure S2, but without the addition of CD8<sup>+</sup> OT-I T cells, including groups with TCD-BM supplemented with purified CD8<sup>+</sup> T cells, and mice were treated as indicated. CD4<sup>+</sup> T cell frequency in the peripheral blood; n = 5; ●: E.G7-gp96-Ig, ○: E.G7-gp96-Ig (Purified CD8), ■: E.G7-gp96-Ig + IL-2<sub>S4B6</sub>, □: E.G7-gp96-Ig + IL-2<sub>S4B6</sub> (Purified CD8). The results for ‘E.G7-gp96-Ig + IL-2<sub>S4B6</sub>’ and ‘E.G7-gp96-Ig + IL-2<sub>S4B6</sub> (Purified CD8)’ were repeated in an independent experiment.

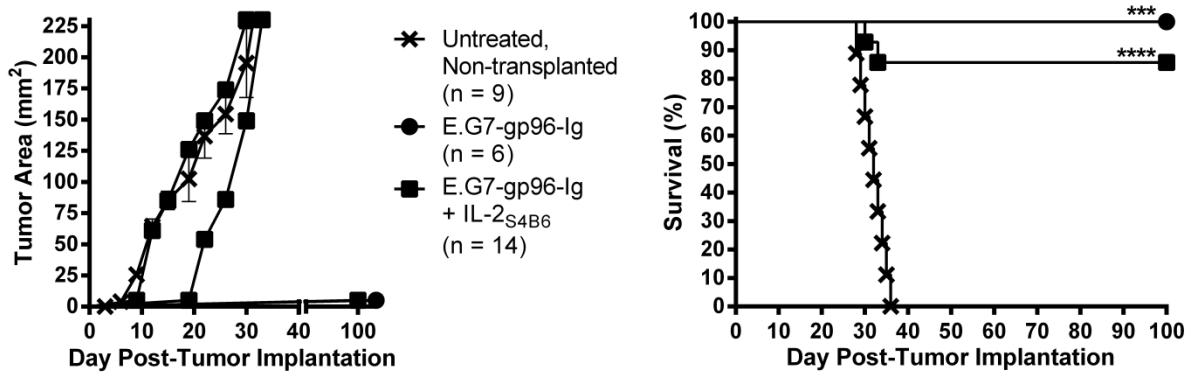

**Figure S9. Kinetics of tumor growth and survival in previously vaccinated HSCT recipients challenged with a lethal number of tumor cells.** Previously vaccinated transplant recipients (>100 d post-HSCT; Figures 4-6) were challenged with a lethal number ( $1.0 \times 10^6$ ) of tumor cells subcutaneously to determine if anti-tumor memory had been generated by either vaccine strategy. **(Left)** Kinetics of tumor growth and **(right)** survival post-challenge; n = 6-14 from pool of 2 subcutaneous challenge experiments; x: Untreated and Non-transplanted (pooled), ●: E.G7-gp96-Ig (individual), ■: E.G7-gp96-Ig + IL-2<sub>S4B6</sub> (individual).

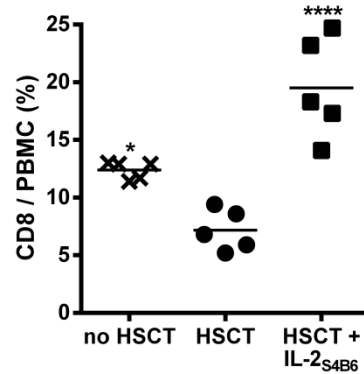

**Figure S10.** IL-2<sub>S4B6</sub> infusion induced expansion of CD8<sup>+</sup> T cells in HSCT recipients immediately prior to *Listeria monocytogenes* challenge. Transplants were performed as in Figure S2 and HSCT recipients were infused with IL-2<sub>S4B6</sub> 3 d post-HSCT and every 3 d for a total of 4 infusions as indicated. CD8<sup>+</sup> T cell frequency in the peripheral blood 2 wk post-HSCT; n = 5 from representative of 2 experiments; x: no HSCT, ●: HSCT, ■: HSCT + IL-2<sub>S4B6</sub>.
